# Supplementary material for: P90 RSK arranges Chk1 in the nucleus for monitoring of genomic integrity during cell proliferation
Source: PubMed Central journal article supplement — Mol Biol Cell. 2012 Apr 15;23(8):1582–92. doi: 10.1091/mbc.E11-10-0883 (PMC3327324; doi:10.1091/mbc.e11-10-0883), 2012-04-15
Supplement: supp_E11-10-0883_CombinedSupMats.pdf [file supp_E11-10-0883_CombinedSupMats.pdf]

## SUPPLEMENTAL FIGURE LEGENDS

Figure S1. Li, P., *et al*

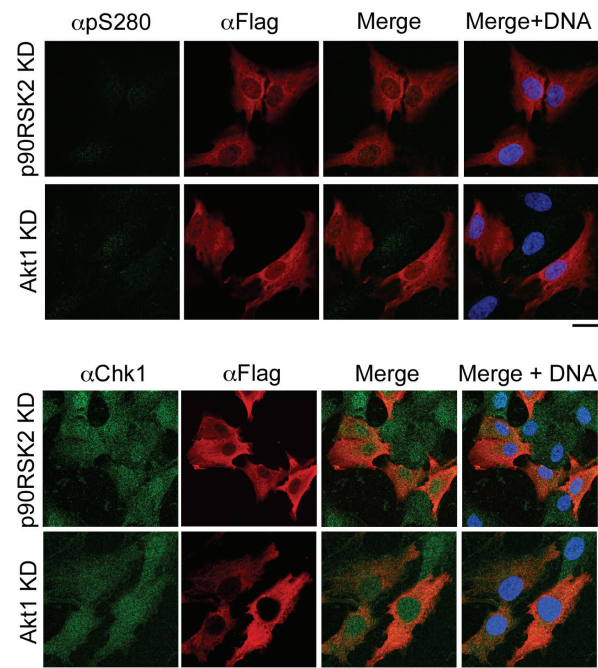

**Figure S1.** Effects of kinase-dead mutant of p90 RSK2 or Akt1 on Chk1 phosphorylation and localization. Tet-On RPE1 cell line was cultured in the serum-free medium for 48 h. After treatment, cells were cultured in a serum-free medium with 100 ng/ml Dox for 6 h. Cells were stained with  $\alpha$ pS280 or  $\alpha$ Chk1 (green) in addition to  $\alpha$ Flag (red) and DAPI (blue). Scale bar; 10  $\mu$ m.

Figure S2. Li, P., et al.

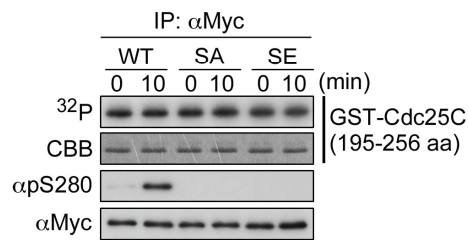

**Figure S2.** Chk1-Ser280 phosphorylation has little impact on its catalytic activity. Tet-On RPE1 cell line was cultured in the serum-free medium containing Dox for 48 h. After serum starvation, cells were incubated in the growing medium for 0 or 10 min. After treatment, cells were subjected to  $\alpha$ Myc immunoprecipitation. Myc-Chk1 kinase activity was measured as described previously (Kasahara *et al.*, 2010).

## **SUPPLEMENTAL REFERENCE**

Kasahara, K., Goto, H., Enomoto, M., Tomono, Y., Kiyono, T., and Inagaki, M. (2010).

14-3-3 $\gamma$  mediates Cdc25A proteolysis to block premature mitotic entry after DNA damage. *EMBO J* 29, 2802-2812.
